# Supplementary material
Source: Springer Nature journal article supplement (https://www.springermedizin.de/resource/supplementary/12958_2010_811_MOESM5_ESM.pdf/9568904)

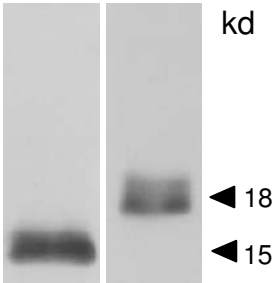

BMP15

GDF9

Supplement: MOESM5 [file 9568904]
